# Supplementary material for: Resistomycin Suppresses Prostate Cancer Cell Growth by Instigating Oxidative Stress, Mitochondrial Apoptosis, and Cell Cycle Arrest
Source: MDPI journal article supplement (doi:10.3390/molecules28237871), 2023-11-30
Supplement: s1 [file s1]

## Supporting Information

# Resistomycin Suppresses Prostate Cancer Cell Growth by Instigating Oxidative Stress, Mitochondrial Apoptosis, and Cell Cycle Arrest

Abeer S. Aloufi <sup>1</sup>, Ola A. Habotta <sup>2</sup>, Mohamed S. Abdelfattah <sup>3</sup>, Marina N. Habib <sup>3</sup>, Mohamed M. Omran <sup>3</sup>, Sally A. Ali <sup>4</sup>, Ahmed E. Abdel Moneim <sup>5,\*</sup>, Shereen M. Korany <sup>1</sup>, Aisha M. Alrajhi <sup>1</sup>

- <sup>1</sup> Department of Biology, College of Science, Princess Nourah bint Abdulrahman University, P.O. Box 84428, Riyadh 11671, Saudi Arabia; asaloufi@pnu.edu.sa (A.S.A.); smkorany@pnu.edu.sa (S.M.K.); amalrajhi@pnu.edu.sa (A.M.A.)
  - <sup>2</sup> Department of Forensic Medicine and Toxicology, Faculty of Veterinary Medicine, Mansoura University, Mansoura 35516, Egypt; ola\_ali@mans.edu.eg
  - <sup>3</sup> Chemistry Department, Faculty of Science, Helwan University, Cairo 11795, Egypt; mabdelfattah@science.helwan.edu.eg (M.S.A.); marinanabil2104@gmail.com (M.N.H.)
  - <sup>4</sup> Botany and Microbiology Department, Faculty of Science, Helwan University, Cairo 11795, Egypt; sally\_ali@science.helwan.edu.eg
  - <sup>5</sup> Zoology and Entomology Department, Faculty of Science, Helwan University, Cairo 11795, Egypt
- \* Correspondence: ahmed\_abdelmoneim@science.helwan.edu.eg

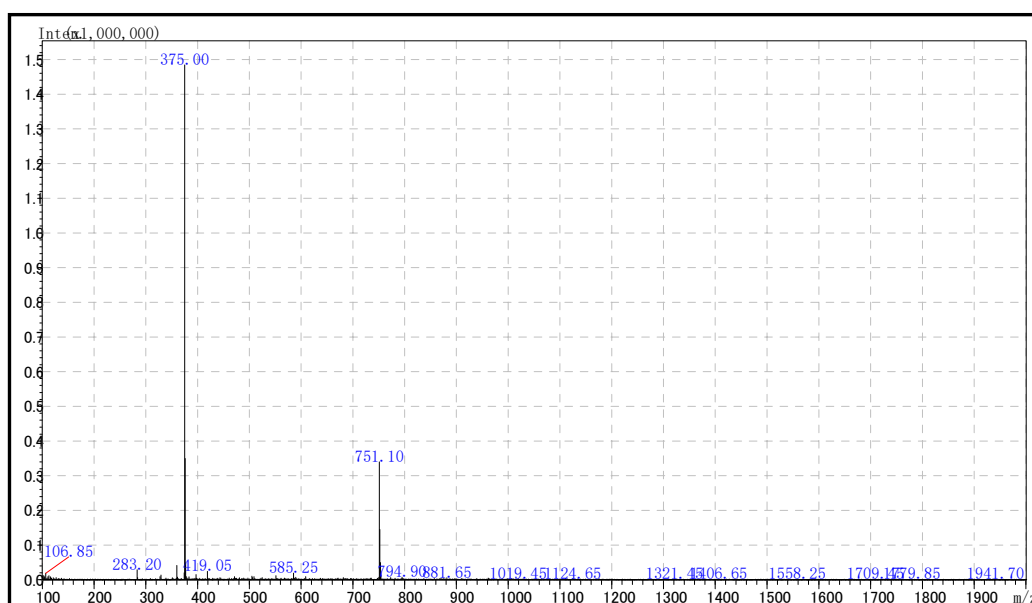

Figure S1: (-)-ESI-MS of resistomycin

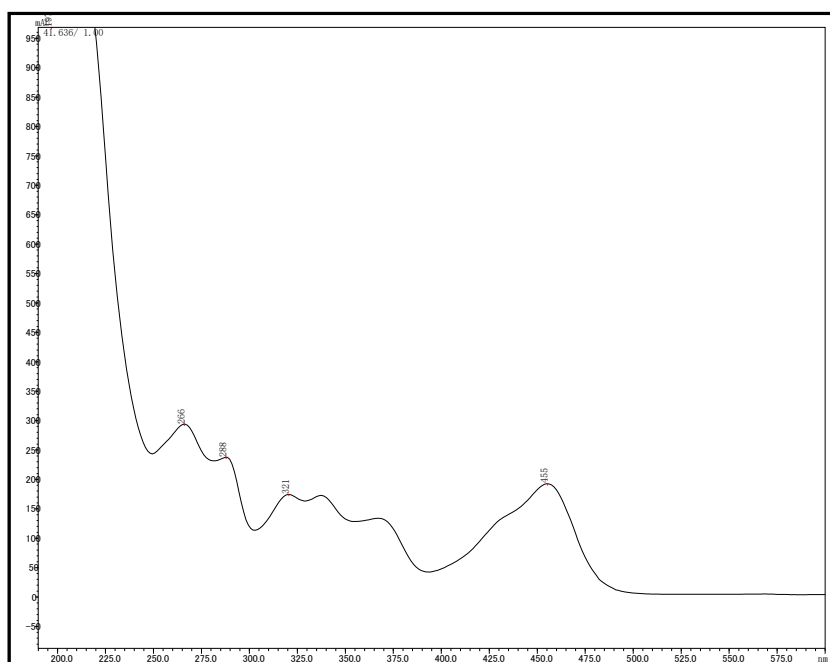

**Figure S2:** UV spectra of resistomycin in MeOH

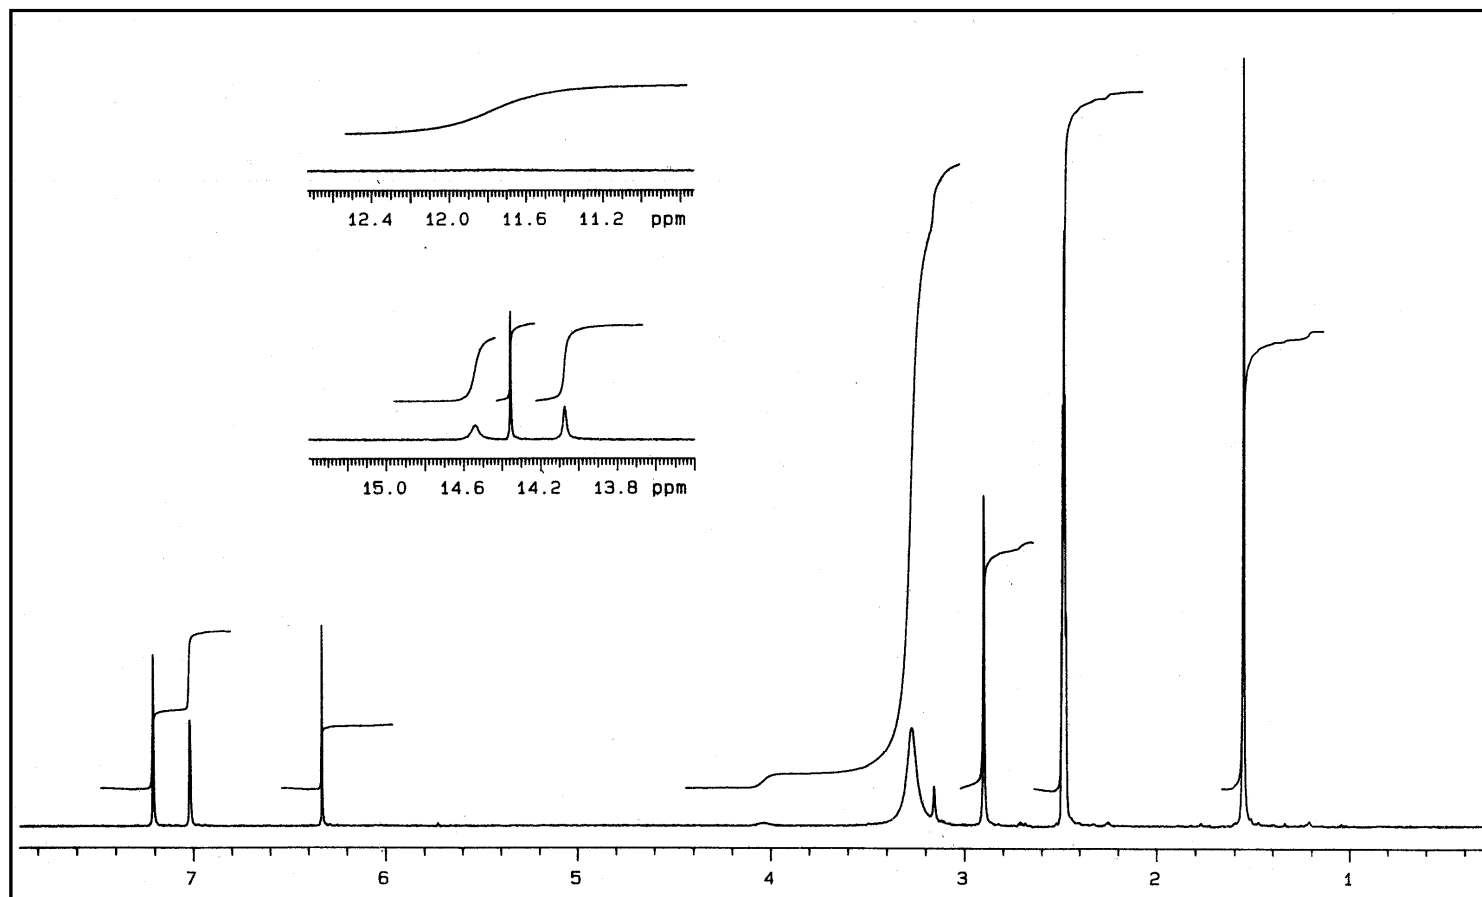

**Figure S3:**  $^1\text{H}$  NMR spectrum ( $\text{DMSO-d}_6$ , 600 MHz) of resistomycin

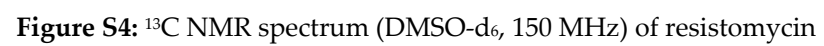

**Figure S4:**  $^{13}\text{C}$  NMR spectrum (DMSO- $d_6$ , 150 MHz) of resistomycin

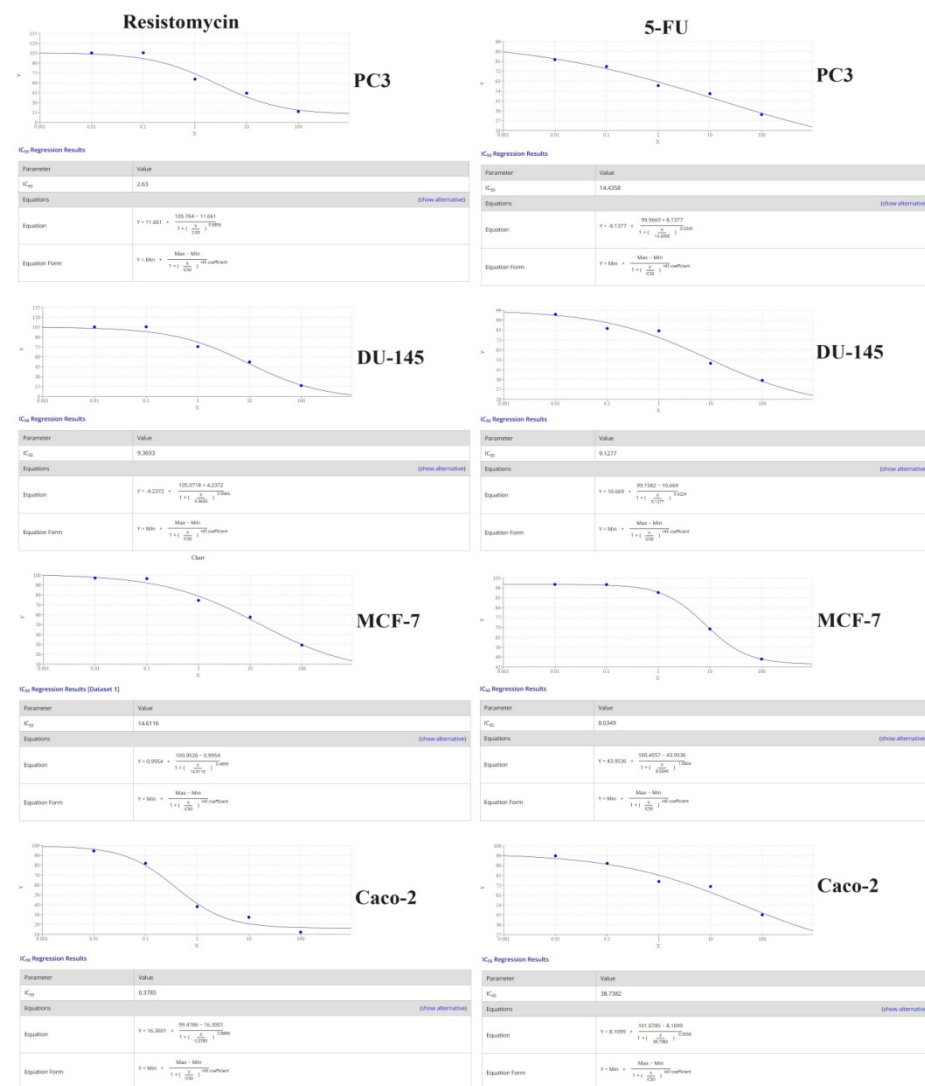

**Figure S5:** Effects of different concentrations of resistomycin or 5-FU treatment (24 h) on PC3, DU-145, MCF-7 and Caco-2 cell lines. The graphs and equations generated using Quest Graph™ IC50 Calculator." AAT Bioquest, Inc., 28 Oct. 2023, <https://www.aatbio.com/tools/ic50-calculator>.

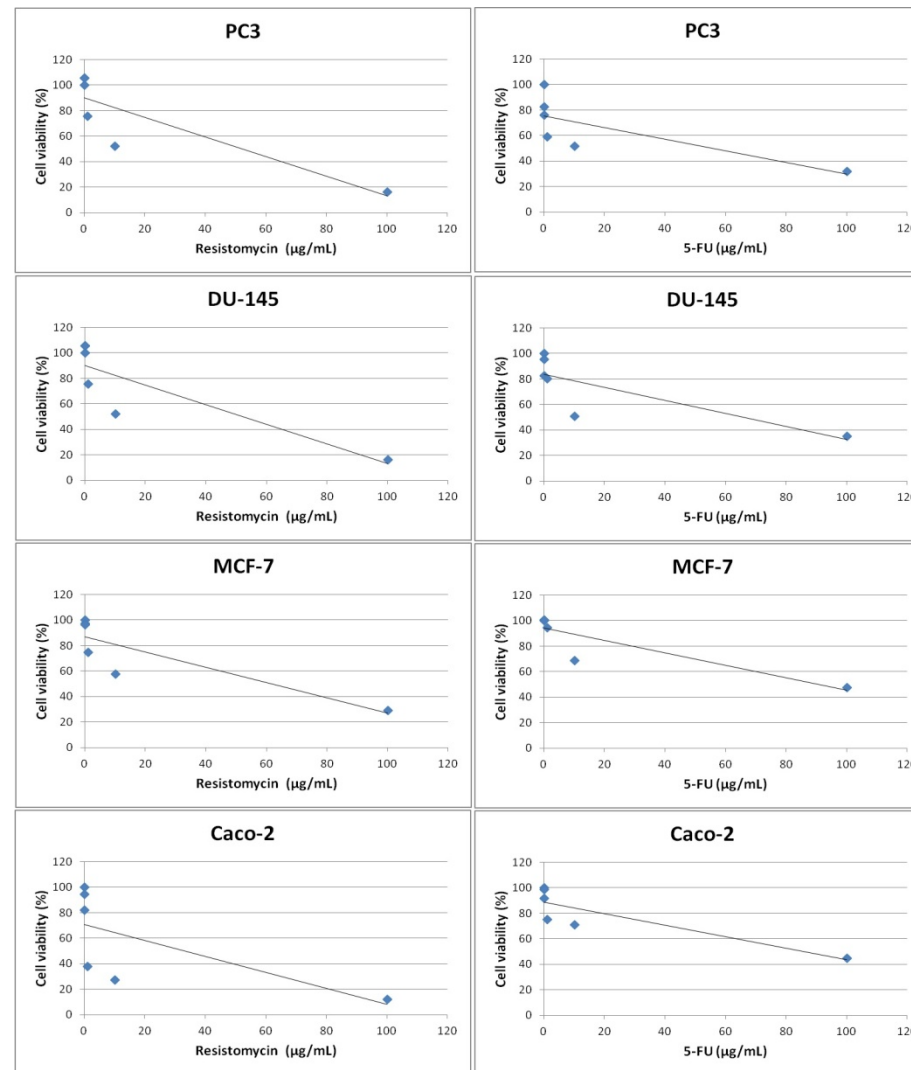

**Figure S6:** Effects of different concentrations of resistomycin or 5-FU treatment (24 h) on PC3, DU-145, MCF-7 and Caco-2 cell lines. The graphs generated using Microsoft Corporation. (2018). Microsoft Excel. Retrieved from <https://office.microsoft.com/excel>.
